# Supplementary material for: Profiling the long noncoding RNA interaction network in the regulatory elements of target genes by chromatin in situ reverse transcription sequencing
Source: PubMed Central journal article supplement (PMC6724666; doi:10.1101/gr.244996.118), 2019-09
Supplement: supp_gr.244996.118_Supplemental_Materials.pdf [file supp_gr.244996.118_Supplemental_Materials.pdf]

**Profiling the long noncoding RNA interactome in the regulatory elements of target genes by chromatin *in situ* reverse transcription sequencing**

Shilin Zhang<sup>1\*</sup>, Yichen Wang<sup>1\*</sup>, Lin Jia<sup>1\*</sup>, Xue Wen<sup>1\*</sup>, Zhonghua Du<sup>1\*</sup>, Cong Wang<sup>1,2</sup>, Yajing Hao<sup>3</sup>, Dehai Yu<sup>1</sup>, Lei Zhou<sup>1</sup>, Naifei Chen<sup>1</sup>, Jingchen Chen<sup>1,2</sup>, Huiling Chen<sup>4</sup>, Hui Zhang<sup>7</sup>, Ilkay Celik<sup>2</sup>, Günhan Gülsoy<sup>6</sup>, Jianjun Luo<sup>3</sup>, Baoming Qin<sup>7</sup>, Xueling Cui<sup>8</sup>, Zhonghui Liu<sup>8</sup>, Songling Zhang<sup>1#</sup>, Miguel A. Esteban<sup>7#</sup>, Ferhat Ay<sup>5#</sup>, Wei Xu<sup>1#</sup>, Runsheng Chen<sup>3#</sup>, Wei Li<sup>1#</sup>, Andrew R. Hoffman<sup>2#</sup>, Ji-Fan Hu,<sup>1,2#</sup>, Jiuwei Cui<sup>1#</sup>

<sup>1</sup> Key Laboratory of Organ Regeneration and Transplantation of Ministry of Education, The First Hospital of Jilin University, Changchun, Jilin 130061, P.R. China

<sup>2</sup> Stanford University Medical School, VA Palo Alto Health Care System, Palo Alto, CA 94304, USA

<sup>3</sup> CAS Key Laboratory of RNA Biology, Institute of Biophysics, Chinese Academy of Sciences, Beijing 100101, China, P.R. China

<sup>4</sup> Department of Endocrinology, Xiangya Hospital, Central South University, Changsha, Hunan, P.R. China

<sup>5</sup> La Jolla Institute for Allergy and Immunology, La Jolla, California 92037, USA

<sup>6</sup> Google Inc., Mountain View, CA 94043, USA

<sup>7</sup> Guangzhou Institutes of Biomedicine and Health, Chinese Academy of Sciences, Guangzhou, Guangdong 510530, P.R. China

<sup>8</sup> Department of Immunology, College of Basic Medical Sciences, Jilin University, Changchun, Jilin 130021, P.R. China

## SUPPLEMENTAL TABLES

**Table S1. Top fifty RNAs that interact with the Sox2 promoter**

| gene_id            | gene_name     | Description                                                             | locus                  | ips-Cas9-Sox2 | p-value     | Qvalue      |
|--------------------|---------------|-------------------------------------------------------------------------|------------------------|---------------|-------------|-------------|
| ENSMUSG00000075014 | Gm10800       | predicted_gene_10800                                                    | 2:98666546-98667301    | 289804        | 0           | 0           |
| ENSMUSG00000097312 | Gm26870       | predicted_gene_26870                                                    | 9:3000281-3038316      | 270000        | 6.44E-42    | 7.91E-41    |
| ENSMUSG00000075015 | Gm10801       | predicted_gene_10801                                                    | 2:98662236-98664083    | 143433        | 0           | 0           |
| ENSMUSG00000095891 | Gm10717       | predicted_gene_10717                                                    | 9:3000281-3038316      | 92795.7       | 0           | 0           |
| ENSMUSG00000095280 | Gm21738       | predicted_gene_21738                                                    | 14:19415856-19418930   | 57206.9       | 0           | 0           |
| ENSMUSG00000095547 | Gm10719       | predicted_gene_10719                                                    | 9:3000281-3038316      | 46582.1       | 0           | 0           |
| ENSMUSG00000096519 | Gm10721       | predicted_gene_10721                                                    | 9:3000281-3038316      | 43657.5       | 0           | 0           |
| ENSMUSG00000095186 | Gm10718       | predicted_gene_10718                                                    | 9:3000281-3038316      | 31472.1       | 0           | 0           |
| ENSMUSG00000074564 | Gm10720       | predicted_gene_10720                                                    | 9:3000281-3038316      | 31106.8       | 0           | 0           |
| ENSMUSG00000091028 | Gm10722       | predicted_gene_10722                                                    | 9:3000281-3038316      | 27463.2       | 0           | 0           |
| ENSMUSG00000096201 | Gm10715       | predicted_gene_10715                                                    | 9:3000281-3038316      | 16700.7       | 0           | 0           |
| ENSMUSG00000096385 | Gm11168       | predicted_gene_11168                                                    | 9:3000281-3038316      | 15173.2       | 7.88E-48    | 1.04E-46    |
| ENSMUSG00000079600 | Gm17604       | predicted_gene_17604                                                    | X:165003764-165004829  | 5908.06       | 0           | 0           |
| ENSMUSG00000096736 | Gm17535       | predicted_gene_17535                                                    | 9:3000281-3038316      | 5623          | 1.84E-139   | 5.39E-138   |
| ENSMUSG00000106234 | Gm43535       | predicted_gene_43535                                                    | 9:110951544-110984066  | 4916.22       | 0           | 0           |
| ENSMUSG00000106128 | Gm43520       | predicted_gene_43520                                                    | 3:116818814-116818978  | 4282.81       | 0           | 0           |
| ENSMUSG00000066810 | Gm10181       | predicted_gene_10181                                                    | 9:25089421-25089490    | 3189.07       | 7.88E-285   | 4.23E-283   |
| ENSMUSG00000086807 | Platr21       | pluripotency_associated_transcript_21                                   | X:139240225-139357738  | 3030.74       | 0           | 0           |
| ENSMUSG00000106512 | Gm43078       | predicted_gene_43078                                                    | 3:35413832-35414000    | 2993.53       | 0           | 0           |
| ENSMUSG00000064945 | Rny3          | RNA_Y3_small_cytoplasmic_associated_with_Ro_protein_                    | 6:47781623-47781725    | 2928.53       | 0           | 0           |
| ENSMUSG00000100826 | Shhg14        | small_nucleolar_RNA_host_gene_14                                        | 7:59384596-59411173    | 2302.75       | 0           | 0           |
| ENSMUSG00000106628 | Gm43558       | predicted_gene_43558                                                    | 3:134357291-134357501  | 2101.37       | 0           | 0           |
| ENSMUSG00000031654 | Cbln1         | cerebellin_1_precursor_protein                                          | 8:87468853-87472592    | 1612.6        | 0           | 0           |
| ENSMUSG00000026790 | Odf2          | outer_dense_fiber_of_sperm_tails_2                                      | 2:29889220-29931746    | 1557.75       | 0           | 0           |
| ENSMUSG00000090592 | Gm17571       | predicted_gene_17571                                                    | 9:13444033-13446753    | 1514.2        | 1.22E-227   | 5.47E-226   |
| ENSMUSG00000107569 | RP24-472K15.2 | -                                                                       | 6:139140769-139140933  | 1442.72       | 0           | 0           |
| ENSMUSG00000103322 | Gm37404       | predicted_gene_37404                                                    | 3:62123206-62123565    | 1385.88       | 0           | 0           |
| ENSMUSG00000085328 | Gm17131       | predicted_gene_17131                                                    | 5:127781629-128433077  | 1321.62       | 4.40E-225   | 1.95E-223   |
| ENSMUSG00000094472 | Gm21897       | predicted_gene_21897                                                    | 16:15317457-15318957   | 1296.27       | 0           | 0           |
| ENSMUSG00000055491 | Pprc1         | peroxisome_proliferative_activated_receptor_gamma_coactivator_related_1 | 19:46032592-46072915   | 1259.52       | 0           | 0           |
| ENSMUSG00000107564 | RP23-447L9.3  | -                                                                       | 6:4364231-4364395      | 1154.18       | 1.46E-320   | 9.60E-319   |
| ENSMUSG00000061331 | Gm17132       | predicted_gene_17132                                                    | 5:127781629-128433077  | 1152.04       | 0           | 0           |
| ENSMUSG00000102889 | Gm37282       | predicted_gene_37282                                                    | 9:98748598-98820087    | 1130.13       | 5.97E-314   | 3.74E-312   |
| ENSMUSG00000104961 | Gm43835       | predicted_gene_43835                                                    | 5:64563770-64563919    | 1110.41       | 2.63E-308   | 1.58E-306   |
| ENSMUSG00000103837 | Gm37614       | predicted_gene_37614                                                    | 9:88826603-88826813    | 1091.98       | 0           | 0           |
| ENSMUSG00000105108 | Gm42687       | predicted_gene_42687                                                    | 3:115881580-115934361  | 1074.39       | 2.63E-298   | 1.50E-296   |
| ENSMUSG00000094856 | Gm21962       | predicted_gene_21962                                                    | 3:137671523-137672540  | 1041.57       | 3.40E-125   | 9.05E-124   |
| ENSMUSG00000103234 | Gm37158       | predicted_gene_37158                                                    | Y:16691329-16697033    | 1018.71       | 3.45E-87    | 7.06E-86    |
| ENSMUSG00000031626 | Sorbs2        | sorbin_and_SH3_domain_containing_2                                      | 8:45507787-45827906    | 1001.77       | 9.26E-278   | 4.90E-276   |
| ENSMUSG00000079024 | Gm21961       | predicted_gene_21961                                                    | 15:64979543-65014904   | 972.827       | 8.02E-270   | 4.12E-268   |
| ENSMUSG00000103547 | Gm37665       | predicted_gene_37665                                                    | 9:90863158-90863307    | 908.515       | 7.70E-252   | 3.76E-250   |
| ENSMUSG00000097695 | Gm26905       | predicted_gene_26905                                                    | 8:57774051-58914298    | 897.85        | 7.53E-198   | 2.98E-196   |
| ENSMUSG00000078984 | Gm11027       | predicted_gene_11027                                                    | 12:116275385-116275612 | 855.115       | 0.046782165 | 0.136957613 |
| ENSMUSG00000103070 | Gm37903       | predicted_gene_37903                                                    | 1:137528849-137531230  | 830.087       | 4.47E-29    | 4.61E-28    |
| ENSMUSG00000105285 | Gm43238       | predicted_gene_43238                                                    | 5:62428718-62429077    | 815.998       | 0           | 0           |
| ENSMUSG00000054256 | Msi1          | musashi_RNA_binding_protein_1                                           | 5:115429598-115456698  | 776.785       | 4.06E-215   | 1.71E-213   |
| ENSMUSG00000031098 | Syt8          | synaptotagmin_VIII                                                      | 7:142434849-142440396  | 762.104       | 4.54E-211   | 1.87E-209   |
| ENSMUSG00000085659 | Gm12325       | predicted_gene_12325                                                    | 11:71702309-71704344   | 722.557       | 5.26E-200   | 2.09E-198   |
| ENSMUSG00000104174 | Gm37701       | predicted_gene_37701                                                    | 2:12106631-12312315    | 674.842       | 1.19E-218   | 5.07E-217   |

**Table S2. Top fifty pathways of the Sox2 promoter-interacting RNAs**

| pathway_ID | PATHWAY_DES                                              | target_gene_in_ this_pathway | target_gene_in _all_pathway | all_gene_in_th is_pathway | all_gene_in_ all_pathway | rich_factor | Pvalue    | Qvalue    |
|------------|----------------------------------------------------------|------------------------------|-----------------------------|---------------------------|--------------------------|-------------|-----------|-----------|
| mmu01100   | Metabolic pathways                                       | 143                          | 1121                        | 1286                      | 7510                     | 0.7449539   | 1         | 1         |
| mmu05200   | Pathways in cancer                                       | 56                           | 1121                        | 397                       | 7510                     | 0.9450001   | 1         | 1         |
| mmu04151   | PI3K-Akt signaling pathway                               | 53                           | 1121                        | 345                       | 7510                     | 1.0291794   | 0.7722307 | 1         |
| mmu04080   | Neuroactive ligand-receptor interaction                  | 47                           | 1121                        | 285                       | 7510                     | 1.1048093   | 0.451655  | 1         |
| mmu04024   | cAMP signaling pathway                                   | 45                           | 1121                        | 198                       | 7510                     | 1.5225854   | 0.0069541 | 0.6583235 |
| mmu04144   | Endocytosis                                              | 45                           | 1121                        | 282                       | 7510                     | 1.0690493   | 0.5963987 | 1         |
| mmu04015   | Rap1 signaling pathway                                   | 40                           | 1121                        | 215                       | 7510                     | 1.2463955   | 0.1532033 | 1         |
| mmu04010   | MAPK signaling pathway                                   | 40                           | 1121                        | 253                       | 7510                     | 1.0591898   | 0.6489145 | 1         |
| mmu04020   | Calcium signaling pathway                                | 38                           | 1121                        | 180                       | 7510                     | 1.4143126   | 0.0353502 | 1         |
| mmu05205   | Proteoglycans in cancer                                  | 38                           | 1121                        | 203                       | 7510                     | 1.2540703   | 0.1516755 | 1         |
| mmu04014   | Ras signaling pathway                                    | 37                           | 1121                        | 229                       | 7510                     | 1.0824319   | 0.5657807 | 1         |
| mmu04360   | Axon guidance                                            | 36                           | 1121                        | 175                       | 7510                     | 1.3781573   | 0.0552274 | 1         |
| mmu04810   | Regulation of actin cytoskeleton                         | 36                           | 1121                        | 217                       | 7510                     | 1.1114171   | 0.4703018 | 1         |
| mmu04072   | Phospholipase D signaling pathway                        | 35                           | 1121                        | 143                       | 7510                     | 1.6397073   | 0.0052294 | 0.7425711 |
| mmu04022   | cGMP-PKG signaling pathway                               | 35                           | 1121                        | 172                       | 7510                     | 1.363245    | 0.0662948 | 1         |
| mmu04510   | Focal adhesion                                           | 35                           | 1121                        | 203                       | 7510                     | 1.1550648   | 0.3512603 | 1         |
| mmu04740   | Olfactory transduction                                   | 30                           | 1121                        | 1082                      | 7510                     | 0.1857498   | 1         | 1         |
| mmu04724   | Glutamatergic synapse                                    | 28                           | 1121                        | 115                       | 7510                     | 1.6311523   | 0.0121716 | 0.6913462 |
| mmu04261   | Adrenergic signaling in cardiomyocytes                   | 28                           | 1121                        | 149                       | 7510                     | 1.2589431   | 0.1975834 | 1         |
| mmu04390   | Hippo signaling pathway                                  | 28                           | 1121                        | 154                       | 7510                     | 1.2180683   | 0.2600805 | 1         |
| mmu04530   | Tight junction                                           | 27                           | 1121                        | 140                       | 7510                     | 1.2920224   | 0.1631335 | 1         |
| mmu04060   | Cytokine-cytokine receptor interaction                   | 27                           | 1121                        | 265                       | 7510                     | 0.6825779   | 1         | 1         |
| mmu05166   | HTLV-I infection                                         | 27                           | 1121                        | 283                       | 7510                     | 0.639163    | 1         | 1         |
| mmu05016   | Huntington's disease                                     | 26                           | 1121                        | 196                       | 7510                     | 0.8886927   | 1         | 1         |
| mmu04725   | Cholinergic synapse                                      | 24                           | 1121                        | 113                       | 7510                     | 1.4228762   | 0.0783957 | 1         |
| mmu04919   | Thyroid hormone signaling pathway                        | 24                           | 1121                        | 117                       | 7510                     | 1.3742309   | 0.1080171 | 1         |
| mmu04921   | Oxytocin signaling pathway                               | 24                           | 1121                        | 158                       | 7510                     | 1.0176267   | 0.8286659 | 1         |
| mmu05202   | Transcriptional misregulation in cancer                  | 24                           | 1121                        | 176                       | 7510                     | 0.9135512   | 1         | 1         |
| mmu04550   | Signaling pathways regulating pluripotency of stem cells | 23                           | 1121                        | 140                       | 7510                     | 1.1006117   | 0.5581837 | 1         |
| mmu04062   | Chemokine signaling pathway                              | 23                           | 1121                        | 197                       | 7510                     | 0.7821606   | 1         | 1         |
| mmu04068   | FoxO signaling pathway                                   | 22                           | 1121                        | 134                       | 7510                     | 1.0998975   | 0.5644964 | 1         |
| mmu04630   | Jak-STAT signaling pathway                               | 22                           | 1121                        | 161                       | 7510                     | 0.9154426   | 1         | 1         |
| mmu05152   | Tuberculosis                                             | 22                           | 1121                        | 176                       | 7510                     | 0.8374219   | 1         | 1         |
| mmu00230   | Purine metabolism                                        | 22                           | 1121                        | 178                       | 7510                     | 0.8280127   | 1         | 1         |
| mmu04911   | Insulin secretion                                        | 21                           | 1121                        | 86                        | 7510                     | 1.635894    | 0.0259343 | 1         |
| mmu04713   | Circadian entrainment                                    | 21                           | 1121                        | 98                        | 7510                     | 1.4355805   | 0.0884218 | 1         |
| mmu04750   | Inflammatory mediator regulation of TRP channels         | 21                           | 1121                        | 126                       | 7510                     | 1.1165626   | 0.5245433 | 1         |
| mmu04910   | Insulin signaling pathway                                | 21                           | 1121                        | 142                       | 7510                     | 0.9907527   | 1         | 1         |
| mmu04514   | Cell adhesion molecules (CAMs)                           | 21                           | 1121                        | 164                       | 7510                     | 0.8578469   | 1         | 1         |
| mmu05164   | Influenza A                                              | 21                           | 1121                        | 171                       | 7510                     | 0.8227303   | 1         | 1         |
| mmu05169   | Epstein-Barr virus infection                             | 21                           | 1121                        | 217                       | 7510                     | 0.6483267   | 1         | 1         |
| mmu04520   | Adherens junction                                        | 20                           | 1121                        | 74                        | 7510                     | 1.810642    | 0.010298  | 0.7311571 |
| mmu05032   | Morphine addiction                                       | 20                           | 1121                        | 93                        | 7510                     | 1.4407259   | 0.0919673 | 1         |
| mmu04070   | Phosphatidylinositol signaling system                    | 20                           | 1121                        | 96                        | 7510                     | 1.3957032   | 0.1192444 | 1         |
| mmu04972   | Pancreatic secretion                                     | 20                           | 1121                        | 101                       | 7510                     | 1.326609    | 0.1763637 | 1         |
| mmu04723   | Retrograde endocannabinoid signaling                     | 20                           | 1121                        | 102                       | 7510                     | 1.3136031   | 0.1896189 | 1         |
| mmu04066   | HIF-1 signaling pathway                                  | 20                           | 1121                        | 110                       | 7510                     | 1.2180683   | 0.3180193 | 1         |
| mmu04931   | Insulin resistance                                       | 20                           | 1121                        | 111                       | 7510                     | 1.2070947   | 0.336799  | 1         |
| mmu05145   | Toxoplasmosis                                            | 20                           | 1121                        | 112                       | 7510                     | 1.1963171   | 0.3561545 | 1         |
| mmu04728   | Dopaminergic synapse                                     | 20                           | 1121                        | 132                       | 7510                     | 1.0150569   | 0.832685  | 1         |

**Table S3. Oligonucleotide primers used for PCR**

| <b>ID</b>                     | <b>Oligo Name</b>  | <b>Oligo sequence</b>      | <b>Product size</b> |
|-------------------------------|--------------------|----------------------------|---------------------|
| <b><i>RT-PCR</i></b>          |                    |                            |                     |
| <i>Platr10</i>                | SJ229              | CACTGCTGGTTTGGAGCTCCAT     | 121bp               |
|                               | SJ230              | TGGGACAGTCTCTGGATGGCCT     |                     |
| <i>Pou5f1</i>                 | J648               | CAGAGGATGGCTGAGTGGGCTGTA   | 142bp               |
|                               | J649               | TCAACCCTCAAGGTCCTCTCAC     |                     |
| <i>Sox2</i>                   | J652               | GAAGTTTGGAGCCCAGGCTTAAG    | 164bp               |
|                               | J653               | TGCACGGCCCTGCGCGGAGATCTG   |                     |
| <i>Nanog</i>                  | J650               | GCTTAGGGGGCATCCTCTGATCTA   | 133bp               |
|                               | J651               | ACCTGAAACTTCCCCTAGAGAT     |                     |
| <i>Peln4</i>                  | JH4902             | TGGCAGCCTCTGAGTTGGGCA      | 122bp               |
|                               | JH4093             | CTTGTCTTGACTTGGTAAACATC    |                     |
| <i>Actb</i>                   | J880               | CAGGTCATCACCATTGGCAATGAGC  | 135bp               |
|                               | J881               | CGGATGTCCACGTCACACTTCATGA  |                     |
| <i>U2</i>                     | JH1055             | ATCTGTTCTTATCAGTTTAATATCTG | 151bp               |
|                               | JH1056             | GGGTGCACCGTTCCTGGAGGTAC    |                     |
| <b><i>shRNAs</i></b>          |                    |                            |                     |
| <i>Platr10</i>                | 1                  | TTCTGTGTATCTGTTGAGCCAGGCA  |                     |
|                               | 2                  | CCTGCTGCCTGTCAATCCAAATGTA  |                     |
|                               | 3                  | CTGCCAGCATCTGACTAAGATAGAT  |                     |
|                               | 4                  | TAGTATGGCTGTCCTCGGAGAGGCT  |                     |
| <i>Snhg14</i>                 | 1                  | TTCAAACAATTTGTGAAGAATGTTA  |                     |
|                               | 2                  | TCTCAGTATTGTCATAAGTATGAAG  |                     |
| Control (shCT)                |                    | GCAGCAACTGGACACGTGATCTTAA  |                     |
| <b><i>CRIST Cas9 gRNA</i></b> |                    |                            |                     |
| <i>Sox2</i>                   | pSox2-1            | GGGGTTGAGGACACGTGCTG       |                     |
|                               | pSox2-2            | GAGCCAATATCCGTAGCAT        |                     |
|                               | 5'-gCT             | GAGAGGTACAATGGTCACTC       |                     |
| <i>Pou5f1</i>                 | p <i>Pou5f1</i> -1 | GAACATTCAATGGATGTTTT       |                     |

|                            |                                              |
|----------------------------|----------------------------------------------|
| <i>pPou5f1-2</i><br>5'-gCT | GTGTGAGGGGATTGGGGCTC<br>GAAGTGGGATGATCCTCTGA |
| <i>FLI1</i>                |                                              |
| <i>pFLI1-1</i>             | GATGAGTGGGTGAGCCGCTC                         |
| <i>pFLI1-2</i><br>5'-gCT   | GTGGACCCCGTCATTGTTCC<br>GTATGACTGGTCTCCTTATA |
| <i>IGF2</i>                |                                              |
| <i>pIGF2-1</i>             | GCCTTGCGTTCCCCAAAATT                         |
| <i>pIGF2-2</i><br>5'-gCT   | GTCGCCGGCTTCCAGGTAAG<br>GTTCTACGGTGTTATGTCAA |
| Control (gCT)              | GAAGTGGGATGATCCTCTGA                         |

---

### *LncRNA PCR*

---

|                |        |                           |       |
|----------------|--------|---------------------------|-------|
| <i>Spilr32</i> | JH4117 | GAGTAGTGCATTAATAATGG      | 112bp |
|                | JH4118 | CCACCTCTAGTTTTTCAGAACTG   |       |
| <i>Spilr33</i> | JH4119 | GAGATGGTGGCTAAACCAGG      | 102bp |
|                | JH4120 | GAGGCACTGGAGACCATGATG     |       |
| <i>Spilr22</i> | JH4096 | CTCAGCCTAACGTCTCCAAGC     | 126bp |
|                | JH4097 | CTGATGCTCCAGCTTCTCAGAC    |       |
| <i>Spilr5</i>  | JH4016 | CCGATTGCTGCTGCTTCTACTT    | 118bp |
|                | JH4017 | CCAGGCTCAGGTTAGCTCCACT    |       |
| <i>Spilr7</i>  | JH4020 | TGGCCTTCAGACTCTATCATCCA   | 113bp |
|                | JH4021 | GCCTCATGTTGACGTTTCATCCA   |       |
| <i>Spilr8</i>  | JH4082 | CTCGGAGAGGCTCTGCCAGCAT    | 119bp |
|                | JH4083 | GAGCTGTCAGAACATGCATGTC    |       |
| <i>Spilr9</i>  | JH4027 | CACTGCTGGTTTTGGAGCTCCATG  | 122bp |
|                | JH4028 | GTGGGACAGTCTCTGGATGGCCT   |       |
| <i>Snhg14</i>  | JH5188 | CTGCATCAGCAAAGAGTAGTGC    | 159bp |
|                | JH5189 | TGGCTGTAGAACCAACGGCTA     |       |
| <i>Snurf</i>   | JH5190 | TCATTGGCACCTTCAAGGCT      | 208bp |
|                | JH5191 | GGCACACGAGCAATGCCAGT      |       |
| <i>Actb</i>    | J880   | CAGGTCATCACCATTGGCAATGAGC | 135bp |
|                | J881   | CGGATGTCCACGTCACACTTCATGA |       |

---

### *Sox2*

---

|            |        |                       |       |
|------------|--------|-----------------------|-------|
| 5-Ct       | JH4405 | CATAAGTAGTTCCTCCACTGA | 135bp |
|            | JH4406 | AATGCAAGGGCTTTGCACGC  |       |
| pSox2      | JH4373 | GAGCCAATATTCGGTAGCATG | 136bp |
|            | JH4374 | CGCTGGGGAACCTTTGTATC  |       |
| Off target | JH5877 | AGCCATCCTGTCCTCCGCCTG | 128bp |
|            | JH5878 | CTGCACGGAAGGTCACGATG  |       |

---

## A. CRIST-seq

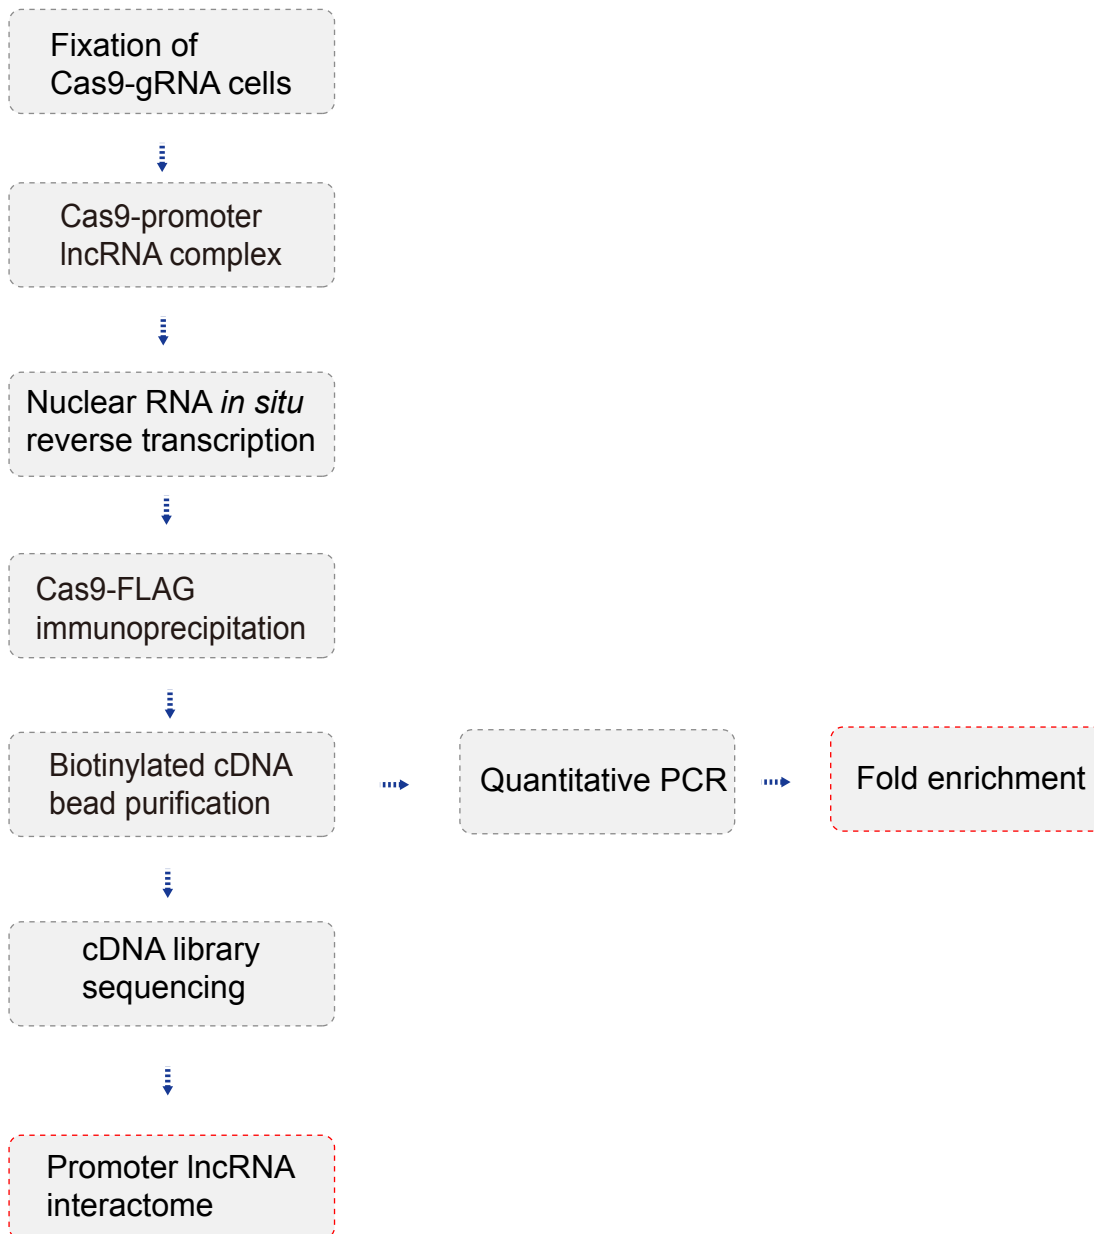

### Figure S1. CRIST-seq assay to map the promoter lncRNA interactome.

Chromatin-RNA *in situ* reverse transcription trap sequencing (CRIST-Seq) assay. Cells were transfected with CRISPR dCas9 gRNA to target the gene promoter. The Cas9-gRNA expressing cells were crosslinked by formaldehyde to fix the promoter RNA chromatin structure. After cell membrane lysis, the nuclei were isolated and the promoter-interacting RNAs were *in situ* reverse transcribed into cDNAs with biotin-dCTP. The promoter biotin-cDNA chromatin complex was first immunoprecipitated by a Cas9-FLAG antibody, and the promoter-interacting biotin-cDNAs were separated from genomic DNAs by streptavidin beads. The CRIST-captured chromatin cDNAs were aliquoted for Illumina library sequencing or quantitative PCR to measure the enrichment of the identified lncRNAs to the target gene promoter.

## A. Sox2 CRIST targeting vector

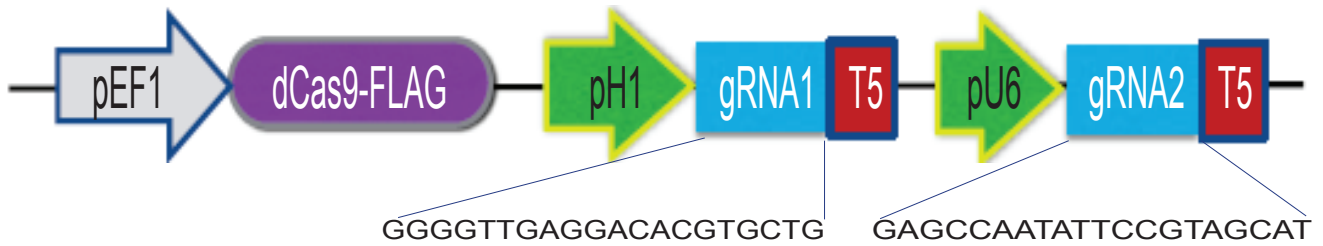

## B. CRIST targeting gRNAs

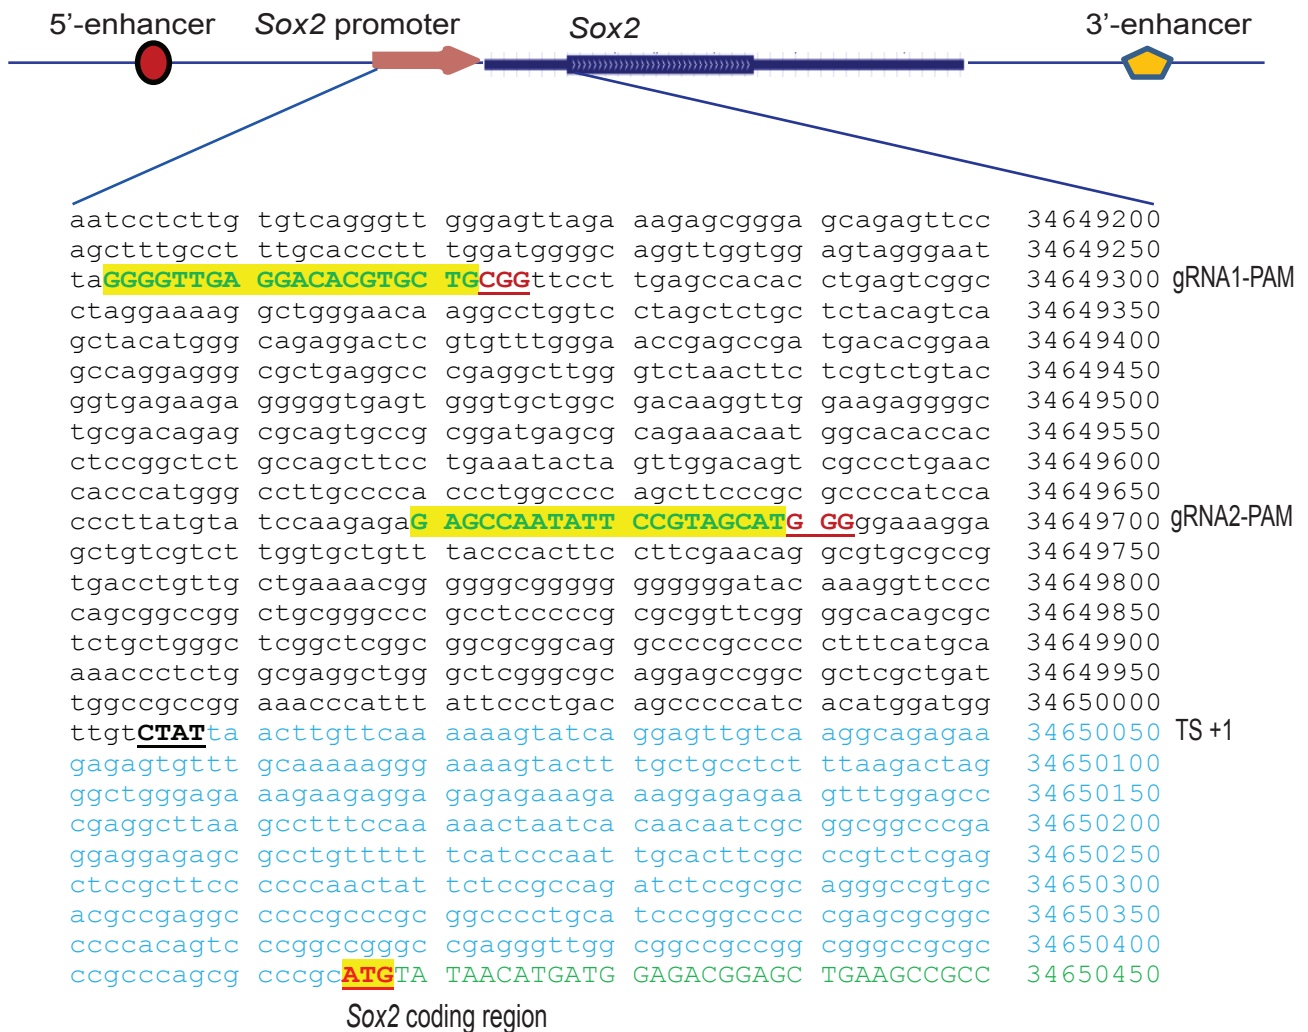

**Figure S2. Location of Sox2 Cas9-gRNAs in the CRIST assay.**

- A. The CRISPR Cas9 Sox2-gRNA vector used in CRIST assay. Cas9: CRISPR Cas9; gRNA1, 2: two Cas9 guiding RNAs that target the Sox2 promoter (sequences under the diagram); pEF1: the human EEF1A1 promoter; pU6: U6 promoter; pH1: human H1 promoter; T5: the TTTTT termination signal of RNA polymerase III.
- B. Location of the two Cas9 gRNAs in the Sox2 promoter. The Sox2 exon 1 mRNA is shown in blue and the coding region with ATG in green. Two Cas9 gRNAs are highlighted in yellow and PAM sequences in red in the Sox2 promoter region. TS+1: transcription initiation site.
- C.

### A. *Pou5f1* CRIST targeting vector

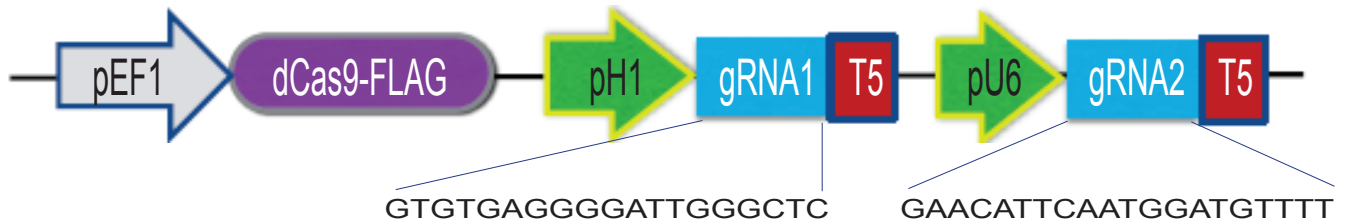

### B. Specific CRIST targeting of *Pou5f1*

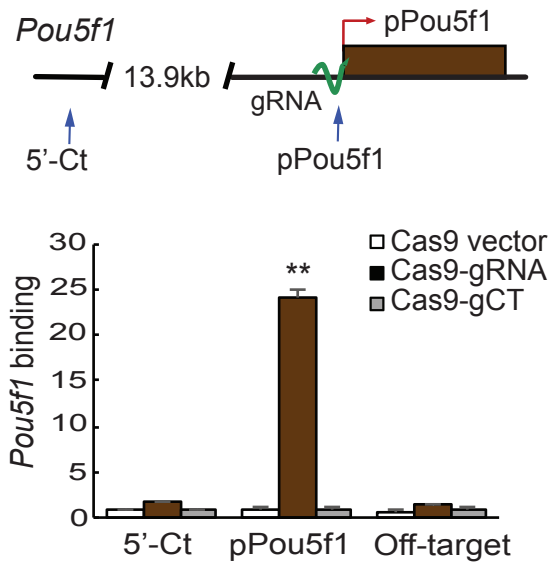

**Figure S3. Specific targeting of the mouse *Pou5f1* promoter in the CRIST assay.**

- A. The CRISPR Cas9 *Pou5f1*-gRNA vector. gRNA1, 2: two Cas9 guiding RNAs that target the *Pou5f1* promoter (sequences under the diagram).
- B. Specific CRIST targeting of the mouse *Pou5f1* promoter. pPou5f1: the targeting site in the *Pou5f1* promoter where the Cas9 gRNAs are designed; 5'-Ct: the *Pou5f1* control site that is 13.9 kb away from the pPou5f1 target site. Cas9 Vector: cells that were treated with the Cas9 control vector that lacks the gRNAs; Cas9-gRNA: cells that were targeted by both Cas9 and *Pou5f1* gRNAs; Cas9-gCT: cells that were treated with the random control gRNA vector. Off-target: a CRIST control site that is 33.8 kb upstream of the housekeeping gene GAPDH. The chromatin complex was immunoprecipitated with a Cas9-FLAG antibody and an IgG control antibody. CRIST signals were quantitated by real-time PCR using specific primers derived from the pOct4 targeting site, 5'-Ct control site and off-target site. All data shown are mean  $\pm$ SEM from three independent experiments by normalization over the IgG control. \*\*  $p < 0.01$  as compared with Vector and gCT controls.



### A. IGF2 CRIST targeting vector

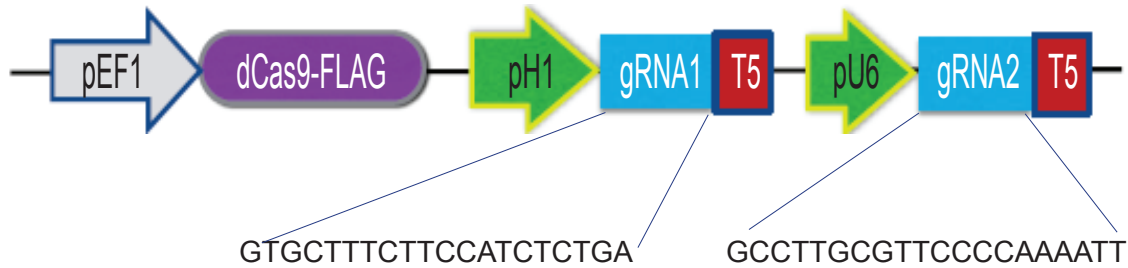

### B. Specific CRIST targeting of IGF2

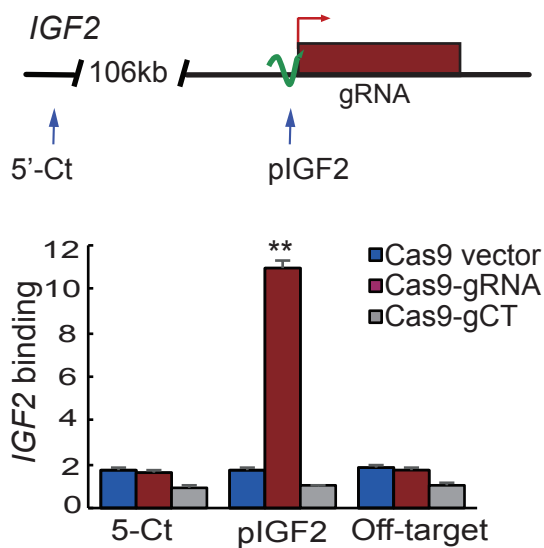

**Figure S4. Specific CRIST targeting of the human *IGF2* imprinting promoters.**

- A. The CRISPR Cas9 IGF2-gRNA vector. gRNA1, 2: two Cas9 guiding RNAs that target the IGF2 imprinting promoters (P2-P4, sequences under the diagram).
- B. Specific CRIST targeting of the growth factor IGF2 promoter. The human IGF2 has four promoters and nine exons. The promoter P1 is not imprinted and it drives the biallelic expression of the growth factor from exons 1, 2, 3, 7, 8, and 9. In contrast, its promoters P2-P4 are imprinted and are expressed exclusively from the paternal allele. In human tumors, however, this imprinting mechanism is dysregulated and causes biallelic expression of the mitogen that promotes tumor growth. We used the CRIST assay to examine the imprinted P2 promoter. pIGF2: the site in the IGF2 promoter where the Cas9 gRNAs are designed; 5'-Ct: IGF2 control site that is 106 kb away from the pIGF2 target site. Vector: cells that were treated with the Cas9 control vector that lacks the gRNAs; Cas9-gRNA: cells that were targeted by both Cas9 and IGF2 gRNAs; Cas9-gCT: cells that were treated with the random control gRNA vector. Off-target: a CRIST control site that is 33.8 kb upstream of the housekeeping gene GAPDH. The chromatin complex was immunoprecipitated with a Cas9-FLAG antibody and an IgG control antibody. CRIST signals were quantitated by real-time PCR using specific primers derived from the pIGF2 targeting site, 5'-Ct control site and off-target site. All data shown are mean±SEM from three independent experiments by normalization over the IgG control. \*\* p<0.01 as compared with Vector and gCT controls.

### A. *FLI1* CRIST targeting vector

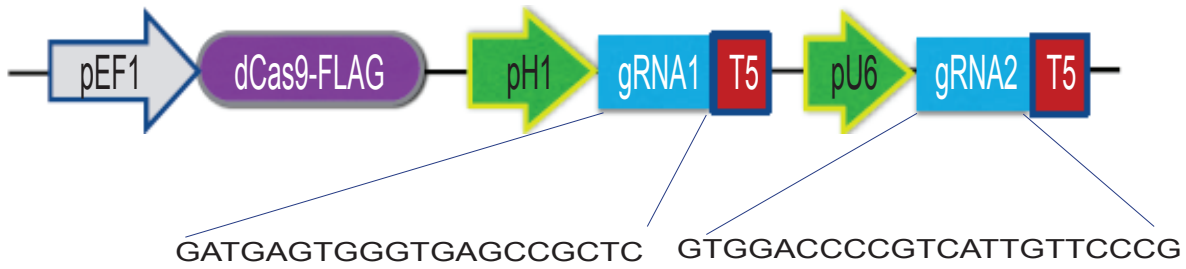

### B. Specific CRIST targeting of *FLI1*

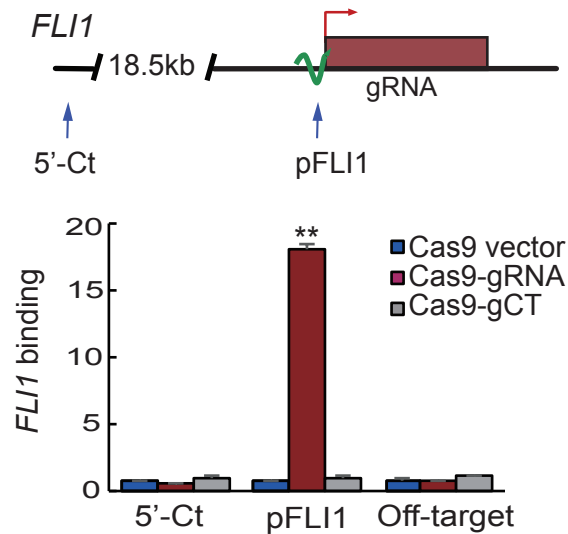

**Figure S5. Specific CRIST targeting of the human *FLI1* promoter.**

- A. The CRISPR Cas9 *FLI1*-gRNA vector. gRNA1, 2: two Cas9 guiding RNAs that target the *FLI1* promoter (sequences under the diagram).
- B. Specific CRIST targeting of the oncogenic *FLI1* promoter. p*FLI1*: the site in the *FLI1* promoter where the Cas9 gRNAs are designed; 5'-Ct: *FLI1* control site that is 18.5 kb away from the p*FLI1* targeting site. Vector: cells that were treated with the Cas9 control vector that lacks the gRNAs; Cas9-gRNA: cells that were targeted by both Cas9 and *FLI1* gRNAs; Cas9-gCT: cells that were treated with the random control gRNA vector. Off-target: a CRIST control site that is 33.8 kb upstream of the housekeeping gene *GAPDH*. The chromatin complex was immunoprecipitated with a Cas9-FLAG antibody and an IgG control antibody. CRIST signals were quantitated by real-time PCR using specific primers derived from the p*FLI1* targeting site, 5'-Ct control site and off-target site. All data shown are mean $\pm$ SEM from three independent experiments by normalization over the IgG control. \*\* p<0.01 as compared with Vector and gCT controls.

### A. *FLI1* CRIST vector

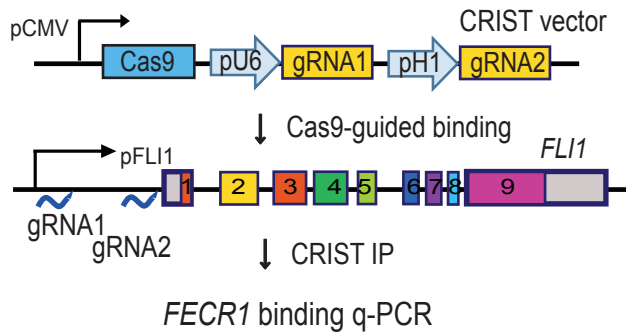

### B. *FECR1-FLI1* interaction

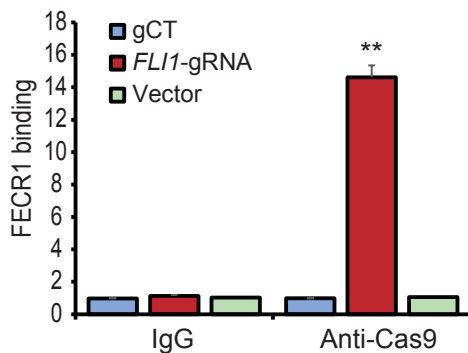

### C. CRIST control (MALAT1)

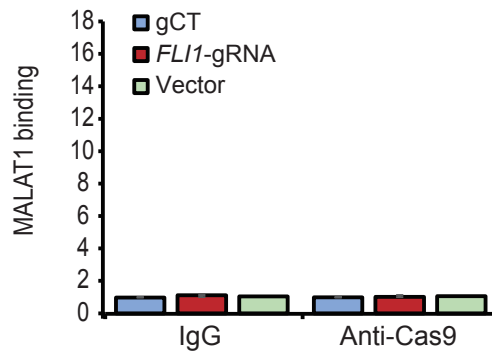

**Figure S6. The *FECR1* circRNA-*FLI1* promoter interaction as a positive CRIST control.**

- A. The *FECR1-FLI1* CRIST vector. *FECR1* is a known circRNA that binds to the *FLI1* promoter and regulates its activity in cis. We thus used it as a CRIST positive control. Two Cas9 *FLI1* gRNAs are transcribed by U6 and H1 promoters, respectively, and guides the dCas9 to the *FLI1* promoter. The *FLI1* CRIST-seq library was used to quantitate the enrichment of *FECR1* circRNA in the *FLI1* promoter.
- B. Enrichment of *FECR1* in the *FLI1* promoter. Vector: cells that were treated with the Cas9 control vector that lacks the gRNAs; Cas9-gRNA: cells that were targeted by both Cas9 and *IGF2* gRNAs; Cas9-gCT: cells that were treated with the random control gRNA vector; Vector: cells that were treated with the empty dCas9 vector. The enrichment of *FECR1* in the *FLI1* promoter was quantitated by qPCR. For comparison, the value of the IgG group was set as 1. \*\*  $p < 0.01$  as compared with the IgG control group.
- C. The nuclear lncRNA MALAT1 is used as the *FLI1* CRIST negative control. The binding of MALAT1 to the *FLI1* promoter was quantitated by qPCR and was standardized over the IgG group.

### Top 30 GO enrichment

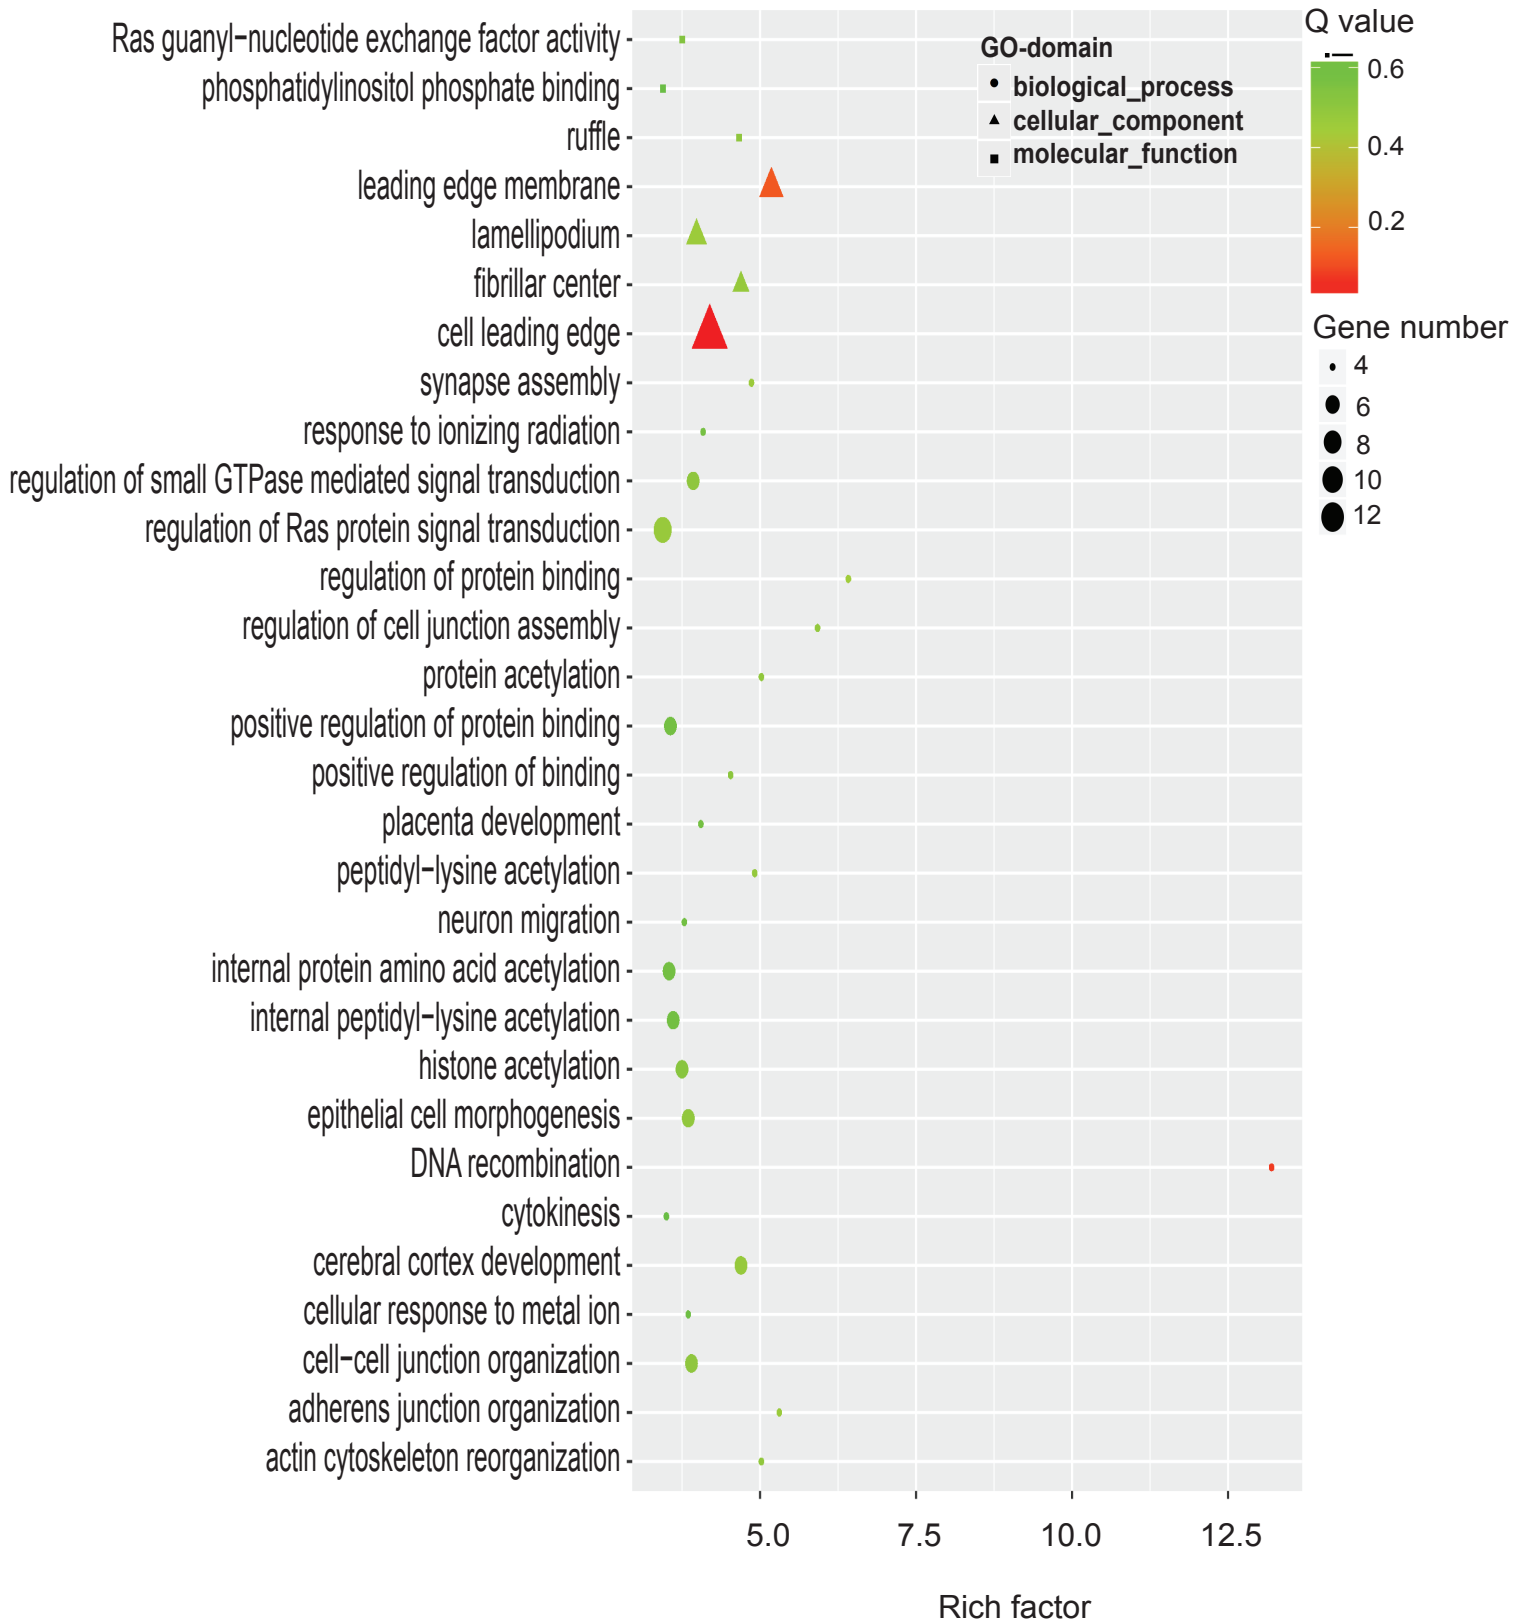

**Figure S7. The top 30 GO enriched target genes of the Sox2-interacting RNA.**

The Go enrichment was analyzed using the ggplot2 package (<http://had.co.nz/ggplot2/>). The top 30 enriched target genes are selected based on the enrichment score and q-value.

### Top 30 of Pathway Enrichment

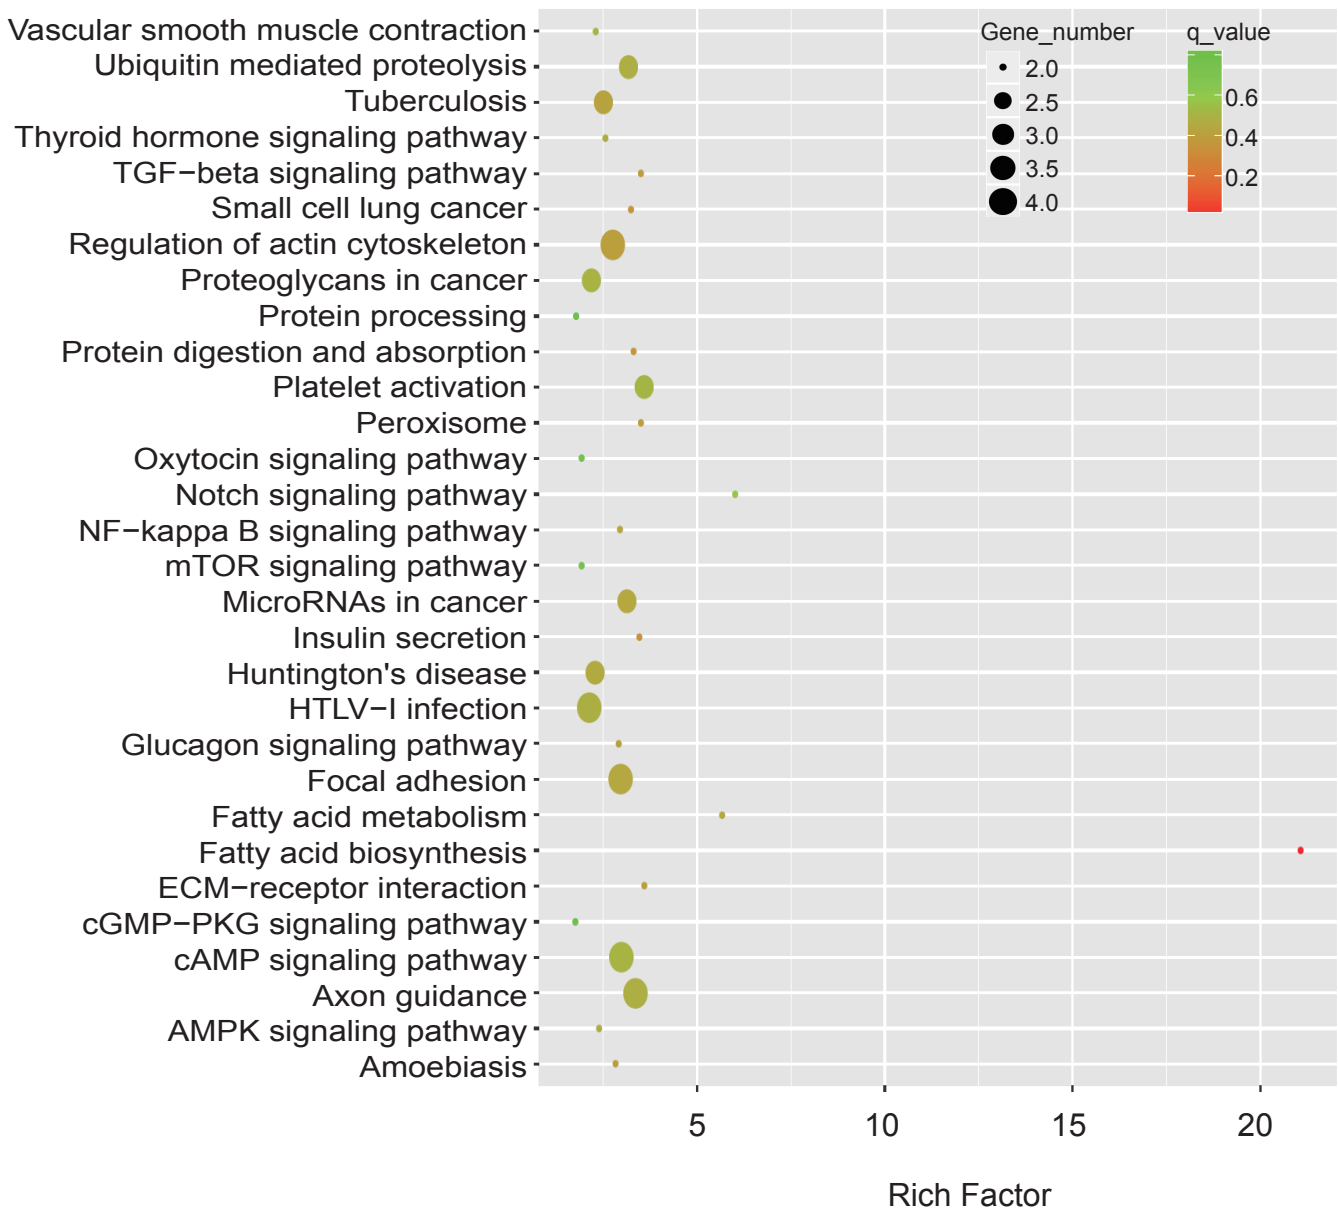

**Figure S8. The top 30 KEGG pathways of the Sox2-interacting RNAs.**

The scatterplot of the top 30 enriched KEGG pathways. KEGG: Kyoto Encyclopedia of Genes and Genomes; rich factor: the ratio of the number of DEGs and the number of all the unigenes in the pathways; Q-value: the corrected p-value.

## A. Differentially expressed Sox2 CRIST lncRNAs

| Gene_id            | Gene_name     | Locus                  | Fold       | p-value     | q-value     |
|--------------------|---------------|------------------------|------------|-------------|-------------|
| ENSMUSG00000073291 | Gm10491       | X:7899356-7908351      | 14300200.0 | 1.22681E-38 | 1.43657E-36 |
| ENSMUSG00000102064 | Gm28625       | 9:84890544-84890749    | 13446000.0 | 1.98227E-36 | 2.15038E-34 |
| ENSMUSG00000065999 | Gm13154       | 4:147553276-147585198  | 1089.6     | 1.19663E-07 | 2.4399E-06  |
| ENSMUSG00000099370 | Platr10       | 3:75647445-75655731    | 987.3      | 3.65379E-20 | 2.19044E-18 |
| ENSMUSG00000003153 | Slc2a3        | 6:122727808-122801640  | 350.0      | 8.5813E-107 | 3.1165E-104 |
| ENSMUSG00000031995 | St14          | 9:31089401-31131853    | 181.8      | 0.003987661 | 0.032151481 |
| ENSMUSG00000106628 | Gm43558       | 3:134357291-134357501  | 108.9      | 0           | 0           |
| ENSMUSG00000008489 | Elavl2        | 4:91250762-91400785    | 41.9       | 1.5543E-06  | 2.66593E-05 |
| ENSMUSG00000068686 | Cd59b         | 2:104069848-104091187  | 41.8       | 1.53644E-06 | 2.65163E-05 |
| ENSMUSG00000105270 | Gm42863       | 5:145504096-145507054  | 31.1       | 2.65617E-11 | 8.45757E-10 |
| ENSMUSG00000087306 | A230004M16Rik | 11:41710341-42000857   | 25.2       | 0.002198209 | 0.019179984 |
| ENSMUSG00000023140 | Reg2          | 6:78395622-78408106    | 22.6       | 5.1177E-06  | 8.08094E-05 |
| ENSMUSG00000053411 | Cbx7          | 15:79891658-79971119   | 19.7       | 1.57911E-12 | 5.69364E-11 |
| ENSMUSG00000087267 | 4933427J07Rik | 2:128955670-128957861  | 14.2       | 1.11677E-10 | 3.30404E-09 |
| ENSMUSG00000061544 | Zfp229        | 17:21730794-21769342   | 11.8       | 4.14055E-05 | 0.000544947 |
| ENSMUSG00000097695 | Gm26905       | 8:57774051-58914298    | 11.5       | 4.75322E-60 | 9.37881E-58 |
| ENSMUSG00000097283 | Gm26686       | 1:128770598-128774421  | 8.4        | 0.003341667 | 0.027383526 |
| ENSMUSG00000101776 | Gm28268       | X:21751378-21761733    | 8.4        | 3.35742E-09 | 8.43022E-08 |
| ENSMUSG00000094856 | Gm21962       | 3:137671523-137672540  | 7.9        | 1.12718E-23 | 7.86794E-22 |
| ENSMUSG00000035299 | Mid1          | X:169685198-170005736  | 7.3        | 1.68227E-12 | 6.03954E-11 |
| ENSMUSG00000105285 | Gm43238       | 5:62428718-62429077    | 7.1        | 3.58084E-52 | 5.78918E-50 |
| ENSMUSG00000102994 | Gm37767       | 1:161942085-162479943  | 6.8        | 9.63652E-05 | 0.001197231 |
| ENSMUSG00000097171 | Gm17644       | 1:12667562-12673090    | 6.3        | 0.000421727 | 0.004477993 |
| ENSMUSG00000061331 | Gm17132       | 5:127781629-128433077  | 5.8        | 3.4147E-06  | 5.54203E-05 |
| ENSMUSG00000028693 | Nasp          | 4:116601051-116627941  | 5.8        | 1.46116E-45 | 2.06865E-43 |
| ENSMUSG00000030309 | Caprin2       | 6:148842491-148896237  | 5.7        | 0.001187481 | 0.011053898 |
| ENSMUSG00000104174 | Gm37701       | 2:12106631-12312315    | 5.5        | 3.28739E-16 | 1.54847E-14 |
| ENSMUSG00000031976 | Urb2          | 8:119910359-124345724  | 5.1        | 6.68347E-05 | 0.000853189 |
| ENSMUSG00000100826 | Snhg14        | 7:59384596-59411173    | 4.6        | 2.34342E-05 | 0.000326424 |
| ENSMUSG00000075014 | Gm10800       | 2:98666546-98667301    | 4.3        | 3.91148E-13 | 1.49874E-11 |
| ENSMUSG00000048897 | Zfp710        | 7:80024813-80094173    | 4.3        | 0.002654322 | 0.022350356 |
| ENSMUSG00000036054 | Sugp2         | 8:70220171-70279915    | 4.2        | 0.00170335  | 0.015271642 |
| ENSMUSG00000103070 | Gm37903       | 1:137528849-137531230  | 4.2        | 0.000243982 | 0.00277402  |
| ENSMUSG00000094472 | Gm21897       | 16:15317457-15318957   | 3.9        | 1.89913E-06 | 3.19827E-05 |
| ENSMUSG00000075015 | Gm10801       | 2:98662236-98664083    | 3.7        | 0.002654322 | 0.022350356 |
| ENSMUSG00000078249 | Hmga1-rs1     | 11:120762793-120764419 | 3.7        | 1.09118E-10 | 3.23597E-09 |
| ENSMUSG00000031575 | Ash2l         | 8:25816190-25847694    | 3.6        | 1.45663E-09 | 3.84227E-08 |
| ENSMUSG00000085328 | Gm17131       | 5:127781629-128433077  | 3.5        | 0.001092886 | 0.010401299 |
| ENSMUSG00000009073 | Nf2           | 11:4765844-4849536     | 3.2        | 2.12854E-05 | 0.000298651 |
| ENSMUSG00000100750 | Gm29084       | 1:61638823-62642284    | 3.2        | 9.43789E-07 | 1.68811E-05 |
| ENSMUSG00000034042 | Gpbp1l1       | 4:116557657-116600266  | 3.1        | 0.000196949 | 0.002290178 |
| ENSMUSG00000079600 | Gm17604       | X:165003764-165004829  | 3.1        | 0           | 0           |
| ENSMUSG00000057113 | Npm1          | 11:33152286-33163206   | 2.8        | 3.293E-106  | 1.1788E-103 |
| ENSMUSG00000054717 | Hmgb2         | 8:57511842-57515999    | 2.7        | 5.11247E-13 | 1.92942E-11 |
| ENSMUSG00000071497 | Nutf2-ps1     | 19:53588203-53589067   | 2.6        | 3.04642E-05 | 0.000416705 |
| ENSMUSG00000057572 | Zbtb8os       | 4:129335694-129378116  | 2.6        | 0.000627727 | 0.006371083 |
| ENSMUSG00000008450 | Nutf2         | 8:105860633-105880402  | 2.6        | 2.34912E-06 | 3.92182E-05 |
| ENSMUSG00000031715 | Smarca5       | 8:80698506-80739497    | 2.0        | 0.00010401  | 0.001284561 |

**Figure S9. Differentially expressed Sox2 promoter-interacting RNAs.**

The Sox2 CRIST-seq RNAs were integrated with the RNA-seq >2 fold RNAs data using a VENN program (<http://bioinformatics.psb.ugent.be/webtools/Venn>). A cut-off threshold of peak enrichment FPKM >50 was arbitrarily set to select CRIST-Seq RNAs. The RNAs are listed in the order of expression fold change of iPSCs over fibroblasts.

### A. Location of Sox2 PCR primers

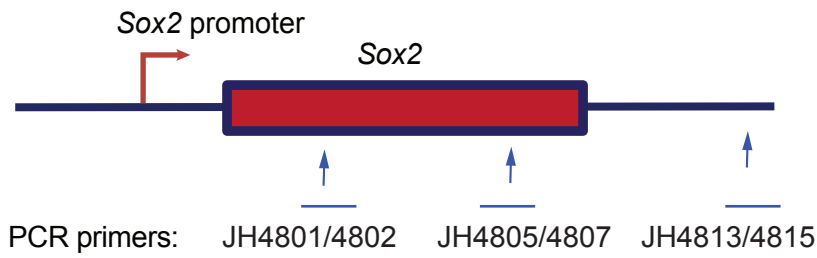

### B. Detection of Sox2 mRNA in CRIST-seq library

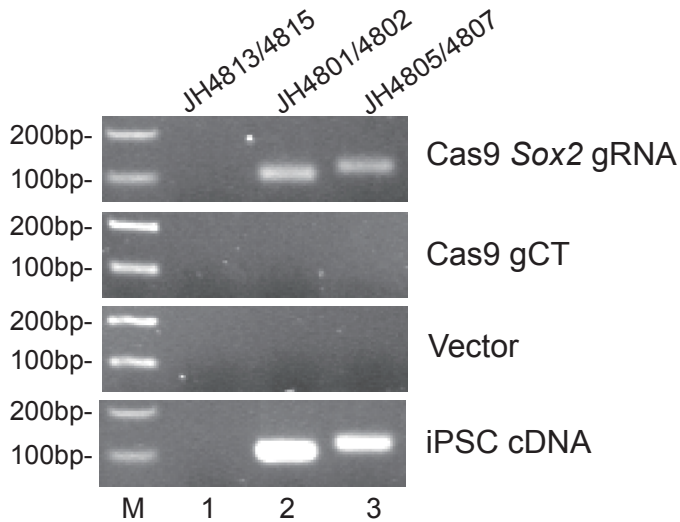

### Figure S10. Detection of the *Sox2* pre-mRNA in the CRIST-seq library.

The abundance of the *Sox2* pre-mRNA in the Cas9 *Sox2*-gRNA CRIST-seq library was detected by two primer sets from the *Sox2* coding sequence. The third pair of PCR primers (JH4813/JH4815) from the downstream sequence was used as the negative control. The iPSC cDNA was used as the positive PCR control. Using this more sensitive PCR, we detected the presence of *Sox2* pre-mRNA in the CRIST-seq products. As expected, no signals were detected in the Cas9 gCT and the Vector control groups.

## A. *Snhg14* RNA-seq data

| Gene_id            | Gene_name     | Locus               | PSC_FPKM | FIB_FPKM | Fold     | p-value     | q-value     |
|--------------------|---------------|---------------------|----------|----------|----------|-------------|-------------|
| ENSMUSG00000100826 | <i>Snhg14</i> | 7:59384596-59411173 | 42.22    | 9.18     | 4.598299 | 2.34342E-05 | 0.000326424 |

## B. *Snhg14* IGV

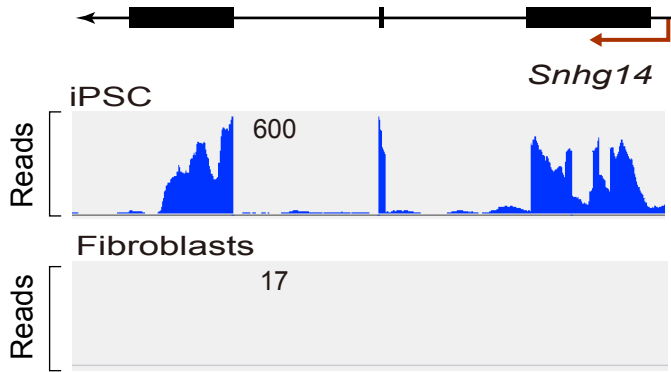

## C. *Snhg14* sequence (NR\_015456)

```

1  atttgtgatt  tcaatttata  ttctggttta  caacttataa  agatagtatt  tcatttataa
61  ttcagttaat  tctgcaatct  caatgttatg  actaaattca  atttgtggta  aatacatatc
121 ctgtaacttt  tctaaatggt  ttaatatggt  tatatatctt  taagctatth  taaaatthtt
181 tatatthttca  tctagtatta  ttaaaggtaa  atacctagta  tagtgtacga  aaaaacagcc
241 tgtatcacat  taaaagcaat  caagagaaat  taaaatcaga  gttaggatta  atgagtaaca
301 tttatcccag  cacctttcaa  gattatacac  agctccgtac  tcagtttggt  gacagctga
361 gctcatttgg  ccttggtgca  aaagaaagtg  tgaaaacaga  aaaactgaac  acatoccttc
421 aacacaaaag  gaattgtaag  aatatgtatt  atttggtgca  atthtagagt  tatctcctaa
481 tathttcatca  thtggtattc  tcaaatgtaa  thtgatthtt  thtggtggac  agtaagatag
541 ccaaatacca  gatctacgaa  aagaacataa  ggattgcagc  ttaaggtgaa  tgtaatthta
601 cagtgaataa  thctctagaa  gaggggtggt  gtattataaa  thaaaaaaag  aaacaagttg
661 cctthcttgta  gacatactth  agthcatact  aaaagagata  gthaaagaaat  thctgattat
721 gcatatgthg  tghtcattaag  gaaatthata  cththgtatc  athaatagta  thaththtaca
781 gtaataaattg  aagatthgtg  caagtcaatt  aaactataca  tgcttgghaa  thgcccacatg
841 ggaccatctt  gaatgaacag  thtatgcaaa  cagaaaacat  gthcagghaag  aatgthaaaa
901 ththtaacact  tgthaaataga  aagaagatga  cattgthcctg  thctthtgtaat  thtatgagghg
961 atthgcaaat  aagcatcaaa  acaagaagaa  aatathaaaa  agacaththtg  thgcccaggaca
1021 tcatggtagt  gctggattgc  ctatccaact  ctgtataaaag  gthththcaaa  caaththgtga
1081 agaatgthtag  tatcttcaga  gtctthctgca  thcagcaaaaga  gtagtgcat  aactaatghga
1141 aaagagaaga  thaaaatthct  gthgthctcatg  atgactagthc  cghaacctgthg  aactthctgag
1201 aaaaatthtaca  gthctgaaaa  ctagagthgg  thaccghaatt  ghatagcccgt  thgthcttaca
1261 gccactataa  tgatctghaaa  agthgaaatg  gthgcatghaa  cactthcaggh  aatcataata
1321 gaactcagct  aatthagatag  agactghaag  gthgaththga  agacaathtac  thtataaaga
1381 thththctcatt  gctgctththg  cattatccca  agaagthggag  aactactac  atghgataaga
1441 actgtatgat  tghaattgact  thghaatcat  thcagthattg  thcataagtht  ghagthgtatt
1501 tcatggthtact  ththghaagthta  gthtatagaat  thththcaatt  ghathththctta  thththcaaaag
1561 gthththtaggta  athatghtagca  tagthctgact  thgagthghgtaa  cattthtagaa  athataaccaggh
1621 thactghthtagg  gcaataththgt  gthghaagathth  actthththtag  thgcatghccaa  atththghghgth
1681 thctgghgtaca  thththattghga  thththaththt  thaataththgt  thataagghca  gctghattatg
1741 gththaaagatg  athagthattac  agththattgthg  caaaaththcta  thactththghaa  ctacaththghg
1801 ththghgtatathc  aagthctacat  thghaththaaat  gthagactthtag  cagghaththaat  ghathththghgccc
1861 aththaaacta  cagghaaththth  agthcaacath  cctctcatath  thghgtaththth  atghgtatghat
1921 ghathgtatghg  acagghaathth  tagthcaacath  thctctcath  thgtatathghta  thgtatghatghg
1981 thaththaththta  ththathththatt  athcaaththcat  gctghthctath  thctghctcath  gththghagthth
2041 ccatghgthaat  thathththatt  thcataagtht  athththaaat  aagthctghgtaa  ghcagghthcatc
2101 atghatghthca  ghataaaathc  thghthththct  actctctghgt  thaththactha  gththththtag
2161 aaththattghcat  thaaaththcaga  atghthctctc  thaaaaaa  aaaaaaa  aaaaaaa

```

**Figure S11. Differential expression of *Snhg14* lncRNA in reprogramming.**

- RNA-seq expression of *Snhg14* between iPSCs and fibroblasts collected in reprogramming.
- IGV Sashimi plot of *Snhg14* lncRNA between iPSCs and fibroblasts.
- Snhg14* lncRNA sequence.



### A. *Snhg14* RNA-DNA FISH

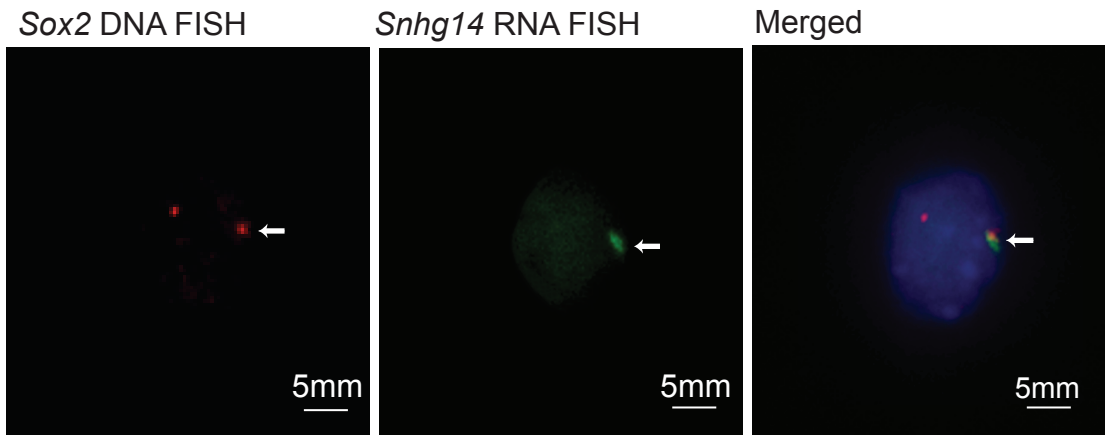

### B. *Palr35* RNA-DNA FISH

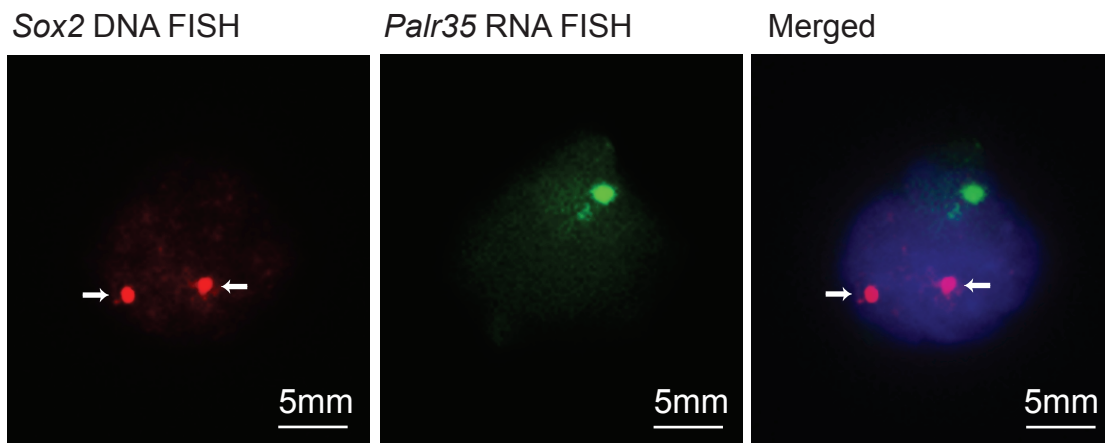

### Figure S12. Interaction of lncRNAs with the *Sox2* locus by RNA-DNA FISH.

- A. *Snhg14* RNA-DNA FISH. The isolated iPSC clones were subjected to RNA FISH (green) using biotin-14-dCTP-labeled single strand DNA probes for *Snhg14*. RNA probes are designed to cover the intron region for specific staining of the mature RNAs. Slides were subsequently re-fixed and processed for DNA FISH (red) using digoxigenin-dUTP labeled BAC probe. The nuclear DNA was stained with DAPI (blue). Arrows mark the co-localization of the *Snhg14* lncRNA signal with the *Pou5f1* DNA signal.
- B. *Palr35* RNA-DNA FISH. Although lncRNA *Palr35* was also differentially expressed in reprogramming, it was not in the list of the *Sox2* CRIST-seq. We thus used it as the RNA FISH control. As the control, RNA-FISH did not detect the co-localization of *Palr35* with *Sox2*.

### A. RAT assay

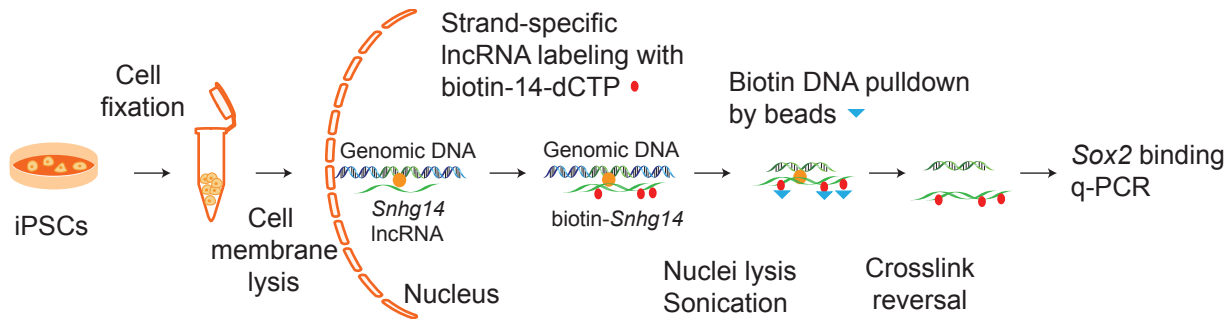

### B. Location of q-PCR primers

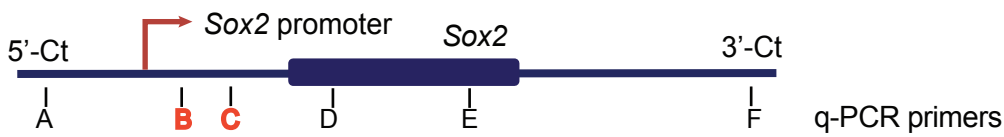

### C. *Snhg14*-*Sox2* interaction

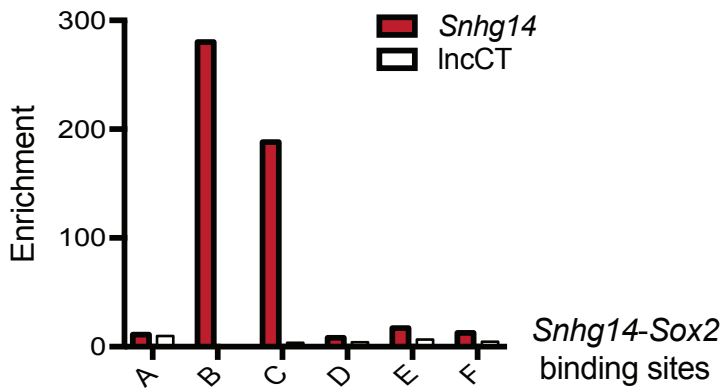

### Figure S13. Validation of the *Snhg14*-*Sox2* interaction by the RAT assay.

- The RAT assay. iPSCs were fixed and *Snhg14* lncRNA was labelled by biotin-dCTP in the nucleus using four *Snhg14*-specific oligonucleotides. The random oligonucleotides were used as the RAT control. After sonication, the biotin-*Snhg14*-chromatin complex was pulled down by streptavidin beads. The chromatin DNA was purified for qPCR.
- Location of qPCR primers. Primers B and C are designed from the *Sox2* promoter.
- The *Snhg14*-*Sox2* interaction by qPCR. The *Snhg14*-pulled down chromatin DNAs were mapped by a series of primers in the *Sox2* locus. Note the enriched signal of the *Sox2* promoter (B, C sites) in the *Snhg14*-pulled down chromatin complex.
